# Supplementary material for: Crystal structures of 5-bromo-1-arylpyrazoles and their halogen bonding features
Source: Royal Society of Chemistry journal article supplement (doi:10.1039/d2ce01355j), 2022-11-23

## Crystal structures of 5-bromo-1-arylpyrazoles and their halogen bonding features

Marcel Mirel Popa,<sup>a</sup> Sergiu Shova,<sup>b,c</sup> Mihaela Dascalu,<sup>c</sup> Mino R. Caira,<sup>d</sup> Florea Dumitrascu<sup>a</sup>

<sup>a</sup>“C.D. Nenitescu” Institute of Organic and Supramolecular Chemistry, Romanian Academy, 202B Splaiul Independenței, 060023 Bucharest, Romania

<sup>b</sup>Ningbo University of Technology, No.55-155, Cui Bai Road, Ningbo City, Zhejiang, 315016, China

<sup>c</sup>“Petru Poni” Institute for Macromolecular Chemistry, Romanian Academy, Aleea Grigore Ghica Voda, nr. 41A, 700487 Iasi, Romania

<sup>d</sup>Department of Chemistry, University of Cape Town, Rondebosch 7701, South Africa

### Contents

|                               |   |
|-------------------------------|---|
| 1. X-ray crystallography..... | 2 |
| 2. Hirshfeld analysis.....    | 6 |

## 1. X-ray crystallography

**Table 1S.** Bond distances (Å) and angles (°) for compounds 1-5

| Compound 1 |          | Compound 2 |           | Compound 3 |          | Compound 4 |          | Compound 5 |          |
|------------|----------|------------|-----------|------------|----------|------------|----------|------------|----------|
| Br1-C7     | 1.843(4) | Br1-C8     | 1.846(9)  | Br1-C9     | 1.856(3) | Br1-C10    | 1.855(4) | Br1-C4     | 1.906(4) |
| F1-C4      | 1.361(4) | Cl1-C5     | 1.728(12) | O1-C12     | 1.194(4) | O1-C13     | 1.193(4) | Br2-C10    | 1.855(4) |
| O1-C10     | 1.203(4) | O1-C11     | 1.188(12) | O2-C12     | 1.325(4) | O2-C13     | 1.326(4) | O1-C13     | 1.191(5) |
| O2-C10     | 1.324(5) | O2-C11     | 1.333(11) | O2-C13     | 1.443(4) | O2-C14     | 1.453(4) | O2-C13     | 1.327(5) |
| O2-C11     | 1.448(5) | O2-C12     | 1.429(12) | O3-C14     | 1.179(4) | O3-C15     | 1.194(4) | O2-C14     | 1.451(4) |
| O3-C12     | 1.200(4) | O3-C13     | 1.186(12) | O4-C14     | 1.322(4) | O4-C15     | 1.329(4) | O3-C15     | 1.199(5) |
| O4-C12     | 1.314(4) | O4-C13     | 1.325(13) | O4-C15     | 1.447(4) | O4-C16     | 1.443(4) | O4-C15     | 1.332(5) |
| O4-C13     | 1.449(4) | O4-C14     | 1.452(12) | N1-N2      | 1.356(3) | N1-N2      | 1.354(4) | O4-C16     | 1.450(4) |
| N1-N2      | 1.351(4) | N1-N2      | 1.362(10) | N1-C1      | 1.443(4) | N1-C1      | 1.445(4) | N1-N2      | 1.366(4) |
| N1-C1      | 1.437(4) | N1-C1      | 1.420(12) | N1-C9      | 1.344(3) | N1-C10     | 1.358(4) | N1-C1      | 1.434(5) |
| N1-C7      | 1.357(4) | N1-C8      | 1.377(11) | N2-C11     | 1.327(4) | N2-C12     | 1.332(4) | N1-C10     | 1.350(4) |
| N2-C9      | 1.327(4) | N2-C10     | 1.333(11) | C1-C2      | 1.385(5) | C1-C2      | 1.370(6) | N2-C12     | 1.324(5) |
| C1-C2      | 1.374(5) | C1-C2      | 1.381(14) | C1-C6      | 1.370(4) | C1-C6      | 1.387(5) | C1-C2      | 1.387(5) |
| C1-C6      | 1.373(5) | C1-C6      | 1.412(14) | C2-C3      | 1.389(4) | C2-C3      | 1.379(6) | C1-C6      | 1.388(5) |
| C2-C3      | 1.373(5) | C2-C3      | 1.380(15) | C3-C4      | 1.374(5) | C3-C4      | 1.377(6) | C2-C3      | 1.382(5) |
| C3-C4      | 1.362(6) | C2-C7      | 1.481(15) | C3-C7      | 1.504(5) | C4-C5      | 1.369(6) | C3-C4      | 1.372(5) |
| C4-C5      | 1.357(6) | C3-C4      | 1.399(16) | C4-C5      | 1.375(6) | C5-C6      | 1.391(6) | C4-C5      | 1.371(5) |
| C5-C6      | 1.377(6) | C4-C5      | 1.366(15) | C5-C6      | 1.393(5) | C6-C7      | 1.502(6) | C5-C6      | 1.393(5) |
| C7-C8      | 1.382(5) | C5-C6      | 1.399(14) | C6-C8      | 1.495(5) | C7-C8      | 1.515(6) | C6-C7      | 1.517(5) |
| C8-C9      | 1.408(5) | C8-C9      | 1.395(13) | C9-C10     | 1.366(4) | C7-C9      | 1.522(6) | C7-C8      | 1.517(5) |
| C8-C12     | 1.481(5) | C9-C10     | 1.418(12) | C10-C11    | 1.403(4) | C10-C11    | 1.371(5) | C7-C9      | 1.529(5) |
| C9-C10     | 1.488(5) | C9-C13     | 1.469(13) | C10-C14    | 1.481(4) | C11-C12    | 1.400(4) | C10-C11    | 1.375(5) |
|            |          | C10-C11    | 1.491(14) | C11-C12    | 1.481(4) | C11-C15    | 1.475(5) | C11-C12    | 1.406(5) |
|            |          |            |           |            |          | C12-C13    | 1.481(5) | C11-C15    | 1.481(5) |
|            |          |            |           |            |          |            |          | C12-C13    | 1.494(6) |
| Compound 1 |          | Compound 2 |           | Compound 3 |          | Compound 4 |          | Compound 5 |          |
| C10-O2-C11 | 115.5(3) | C11-O2-C12 |           | C12-O2-C13 |          | C13-O2-C14 |          | C13-O2-C15 |          |
|            |          | C12        | 116.1(8)  | C13        | 115.8(3) | C14        | 115.5(3) | C14        | 115.2(4) |
|            |          | C13-O4-C14 |           | C14-O4-C15 |          | C15-O4-C16 |          | C15-O4-C16 |          |
| C12-O4-C13 | 116.1(3) | C14        | 117.3(9)  | C15        | 116.4(3) | C16        | 116.0(3) | C16        | 114.5(3) |
| N2-N1-C1   | 119.6(3) | N2-N1-C1   | 121.1(7)  | N2-N1-C1   | 119.8(2) | N2-N1-C1   | 121.2(3) | N2-N1-C1   | 120.3(3) |
| N2-N1-C7   | 112.1(3) | N2-N1-C8   | 111.1(8)  | C9-N1-N2   | 111.3(2) | N2-N1-C10  | 111.4(3) | C10-N1-N2  | 111.0(3) |
| C7-N1-C1   | 128.3(3) | C8-N1-C1   | 127.8(8)  | C9-N1-C1   | 128.9(2) | C10-N1-C1  | 127.4(3) | C10-N1-C1  | 128.5(4) |
|            |          | C10-N2-N1  |           | C11-N2-N1  | 104.4(2) | C12-N2-N1  | 104.6(3) | C12-N2-N1  | 104.7(3) |
| C9-N2-N1   | 104.7(3) | N1         | 104.7(7)  | C2-C1-N1   | 117.4(3) | C2-C1-N1   | 117.5(3) | C2-C1-N1   | 118.6(4) |
| C2-C1-N1   | 120.2(3) | C2-C1-N1   | 121.5(9)  | C6-C1-N1   | 119.1(3) | C2-C1-C6   | 123.0(4) | C2-C1-C6   | 122.4(4) |
| C6-C1-N1   | 118.8(4) | C2-C1-C6   | 122.5(10) | C6-C1-C2   | 123.5(3) | C6-C1-N1   | 119.5(4) | C6-C1-N1   | 119.0(4) |
| C6-C1-C2   | 121.0(4) | C6-C1-N1   | 115.8(9)  | C1-C2-C3   | 120.0(3) | C1-C2-C3   | 119.6(4) | C3-C2-C1   | 119.6(4) |
| C3-C2-C1   | 119.9(4) | C1-C2-C7   | 121.4(10) | C2-C3-C7   | 120.5(4) | C4-C3-C2   | 119.1(5) | C4-C3-C2   | 118.3(4) |
| C4-C3-C2   | 117.9(4) | C3-C2-C1   | 117.0(10) | C4-C3-C2   | 117.2(3) | C5-C4-C3   | 120.3(4) | C3-C4-Br1  | 118.8(4) |
| F1-C4-C3   | 117.8(5) | C3-C2-C7   | 121.6(10) | C4-C3-C7   | 122.3(4) | C4-C5-C6   | 122.3(4) | C5-C4-Br1  | 118.7(3) |
| C5-C4-F1   | 118.8(4) | C2-C3-C4   | 122.5(11) | C3-C4-C5   | 122.0(3) | C1-C6-C5   | 115.7(4) | C5-C4-C3   | 122.4(4) |
| C5-C4-C3   | 123.4(4) | C5-C4-C3   | 119.2(10) |            |          |            |          |            |          |

|           |          |                |           |                 |          |                 |          |                 |          |
|-----------|----------|----------------|-----------|-----------------|----------|-----------------|----------|-----------------|----------|
| C4-C5-C6  | 118.5(4) | C4-C5-C11      | 119.6(9)  | C4-C5-C6        | 121.7(4) | C1-C6-C7        | 123.0(4) | C4-C5-C6        | 120.4(4) |
| C1-C6-C5  | 119.2(4) | C4-C5-C6       | 121.0(11) | C1-C6-C5        | 115.6(3) | C5-C6-C7        | 121.4(4) | C1-C6-C5        | 116.9(4) |
| N1-C7-Br1 | 121.2(3) | C6-C5-C11      | 119.4(9)  | C1-C6-C8        | 122.9(3) | C6-C7-C8        | 110.4(4) | C1-C6-C7        | 122.6(4) |
| N1-C7-C8  | 107.1(3) | C5-C6-C1       | 117.7(9)  | C5-C6-C8        | 121.5(3) | C6-C7-C9        | 111.7(4) | C5-C6-C7        | 120.4(4) |
| C8-C7-Br1 | 131.8(3) | N1-C8-Br1      | 120.9(7)  | N1-C9-Br1       | 121.2(2) | C8-C7-C9        | 111.6(5) | C6-C7-C8        | 111.2(3) |
| C7-C8-C9  | 103.9(3) | N1-C8-C9       | 108.1(8)  | N1-C9-C10       | 108.4(2) | N1-C10-Br1      | 121.8(3) | C6-C7-C9        | 111.3(4) |
| C7-C8-C12 | 123.3(3) | C9-C8-Br1      | 131.0(7)  | C10-C9-Br1      | 130.4(2) | N1-C10-<br>C11  | 107.6(3) | C8-C7-C9        | 111.3(4) |
| C9-C8-C12 | 132.3(3) | C8-C9-C10      | 102.6(7)  | C9-C10-C11      | 103.6(2) | C11-C10-<br>Br1 | 130.5(3) | N1-C10-Br2      | 121.1(3) |
| N2-C9-C8  | 112.2(3) | C8-C9-C13      | 126.3(9)  | C9-C10-C14      | 127.0(3) | C10-C11-<br>C12 | 104.2(3) | N1-C10-<br>C11  | 108.2(4) |
| N2-C9-C10 | 117.6(3) | C10-C9-<br>C13 | 131.0(9)  | C11-C10-<br>C14 | 129.4(3) | C10-C11-<br>C15 | 128.1(3) | C11-C10-<br>Br2 | 130.6(3) |
| C8-C9-C10 | 129.9(3) | N2-C10-C9      | 113.5(8)  | N2-C11-<br>C10  | 112.3(2) | C12-C11-<br>C15 | 127.5(3) | C10-C11-<br>C12 | 103.5(3) |
| O1-C10-O2 | 124.3(4) | N2-C10-<br>C11 | 118.5(8)  | N2-C11-<br>C12  | 119.9(3) | N2-C12-<br>C11  | 112.2(3) | C10-C11-<br>C15 | 126.4(4) |
| O1-C10-C9 | 124.4(4) | C9-C10-<br>C11 | 127.5(8)  | C10-C11-<br>C12 | 127.3(3) | N2-C12-<br>C13  | 120.2(3) | C12-C11-<br>C15 | 129.9(4) |
| O2-C10-C9 | 111.1(3) | O1-C11-O2      | 123.9(10) | O1-C12-O2       | 124.7(3) | C11-C12-<br>C13 | 127.5(3) | N2-C12-<br>C11  | 112.5(4) |
| O3-C12-O4 | 124.0(4) | O1-C11-<br>C10 | 123.7(10) | O1-C12-<br>C11  | 123.1(3) | O1-C13-O2       | 124.4(4) | N2-C12-<br>C13  | 119.3(4) |
| O3-C12-C8 | 123.3(4) | O2-C11-<br>C10 | 112.1(9)  | O2-C12-<br>C11  | 112.2(3) | O1-C13-<br>C12  | 123.3(4) | C11-C12-<br>C13 | 128.2(4) |
| O4-C12-C8 | 112.5(3) | O3-C13-O4      | 125.2(10) | O3-C14-O4       | 125.6(3) | O2-C13-<br>C12  | 112.2(4) | O1-C13-O2       | 125.0(5) |
|           |          | O3-C13-<br>C9  | 124.7(11) | O3-C14-<br>C10  | 124.2(3) | O3-C15-O4       | 124.3(3) | O1-C13-<br>C12  | 123.4(4) |
|           |          | O4-C13-<br>C9  | 110.0(9)  | O4-C14-<br>C10  | 110.1(3) | O3-C15-<br>C11  | 124.4(3) | O2-C13-<br>C12  | 111.6(4) |
|           |          |                |           |                 |          | O4-C15-<br>C11  | 111.3(3) | O3-C15-O4       | 125.6(4) |
|           |          |                |           |                 |          |                 |          | O3-C15-<br>C11  | 124.2(4) |
|           |          |                |           |                 |          |                 |          | O4-C15-<br>C11  | 110.3(4) |

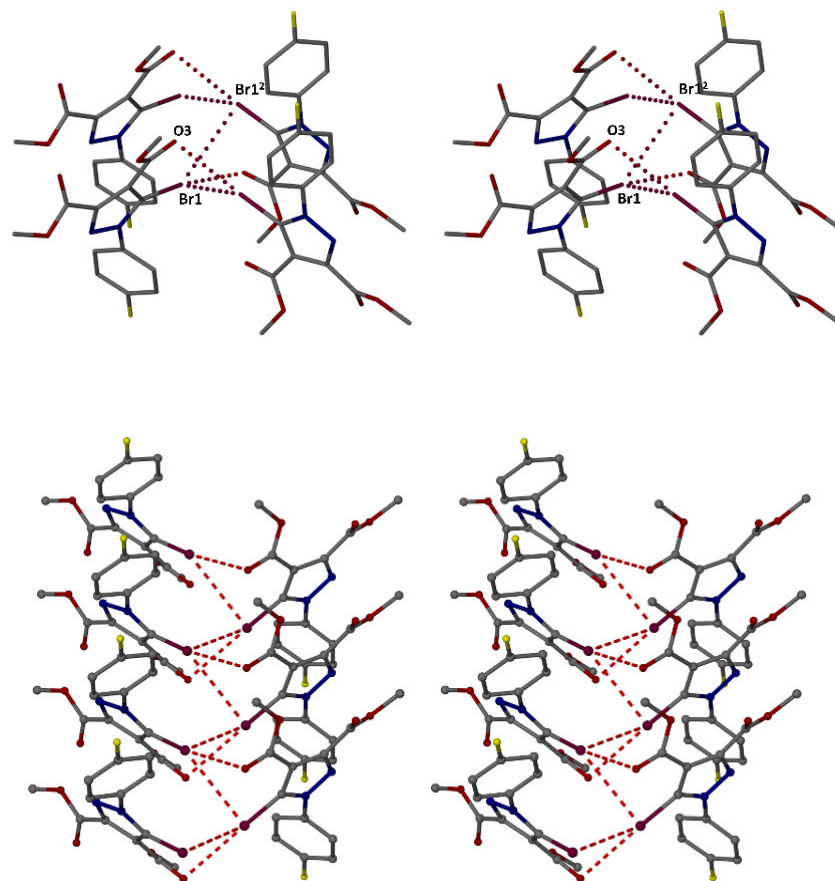

**Figure.1S.** Stereoscopic view of a short length of a continuous array of halogen bond interactions (top) and a longer representative chain of molecules (bottom) to illustrate the trifurcated halogen bonding. These interactions form a continuum running parallel to the crystal b-axis.

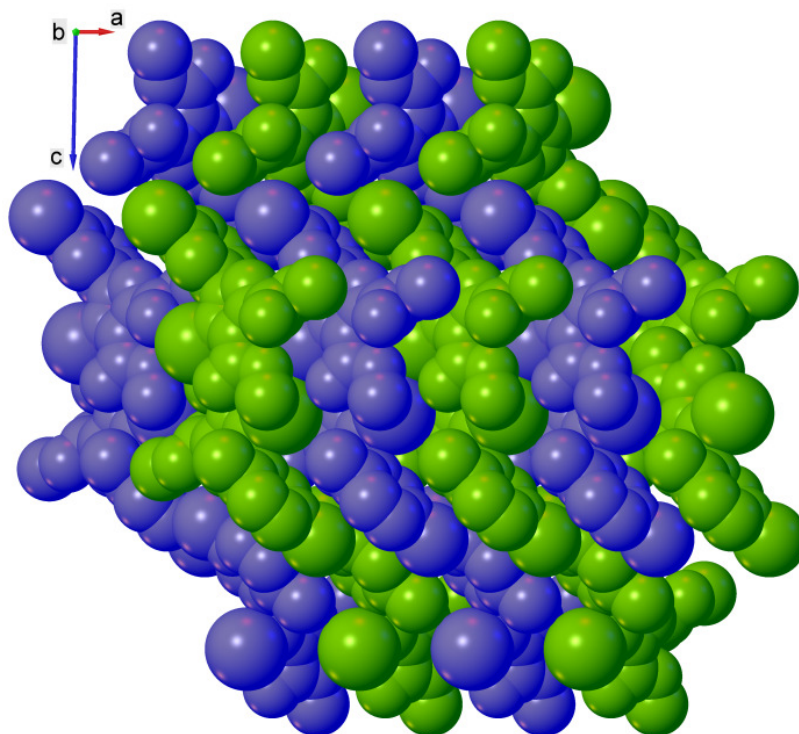

**Figure 2S.** View of crystal structure in crystal 2 viewed along the *b*-axis showing the parallel packing of 2D layers, space filling representation.

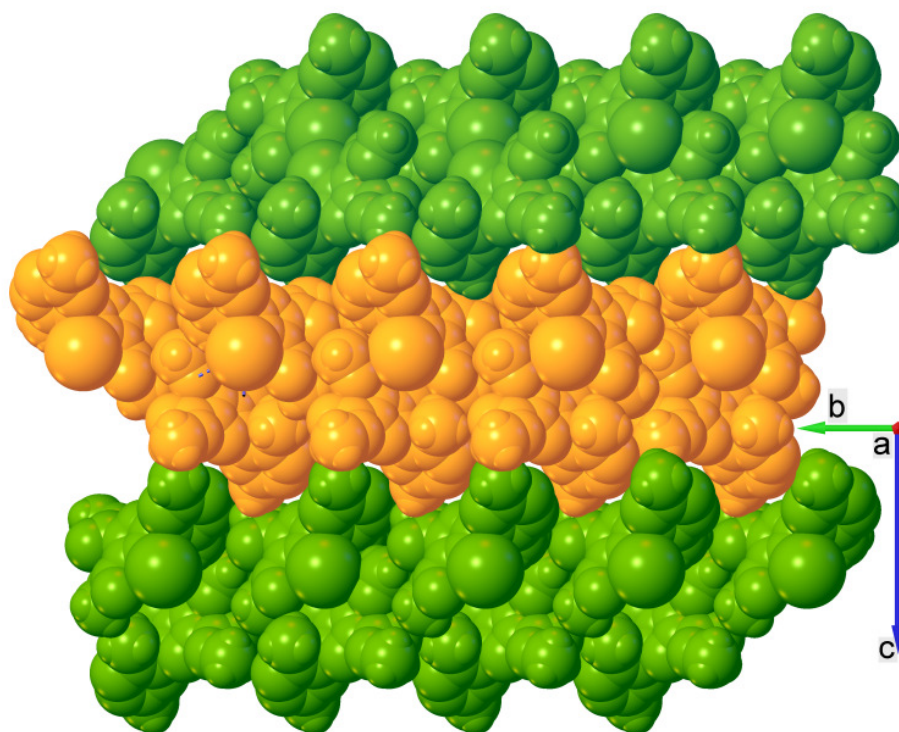

**Figure 3S.** View of the crystal packing showing the parallel arrangement of 2D layers in crystal 3, space filling representation.

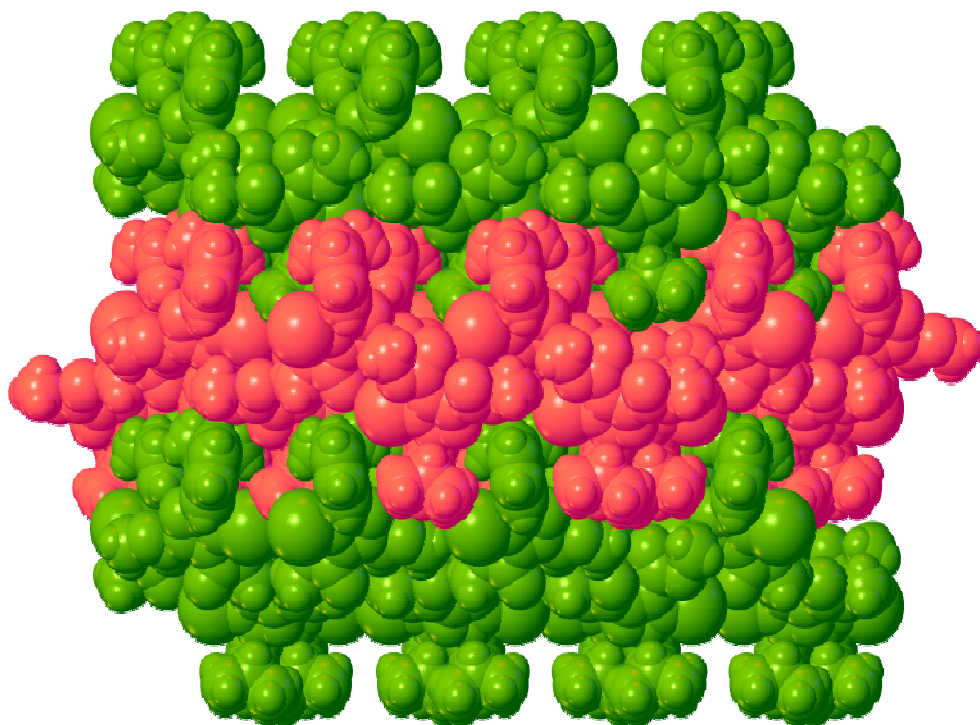

Figure 4S. View of the crystal packing showing the parallel arrangement of 2D layers in crystal 3, space filling representation.

### 1. Hirshfield analysis

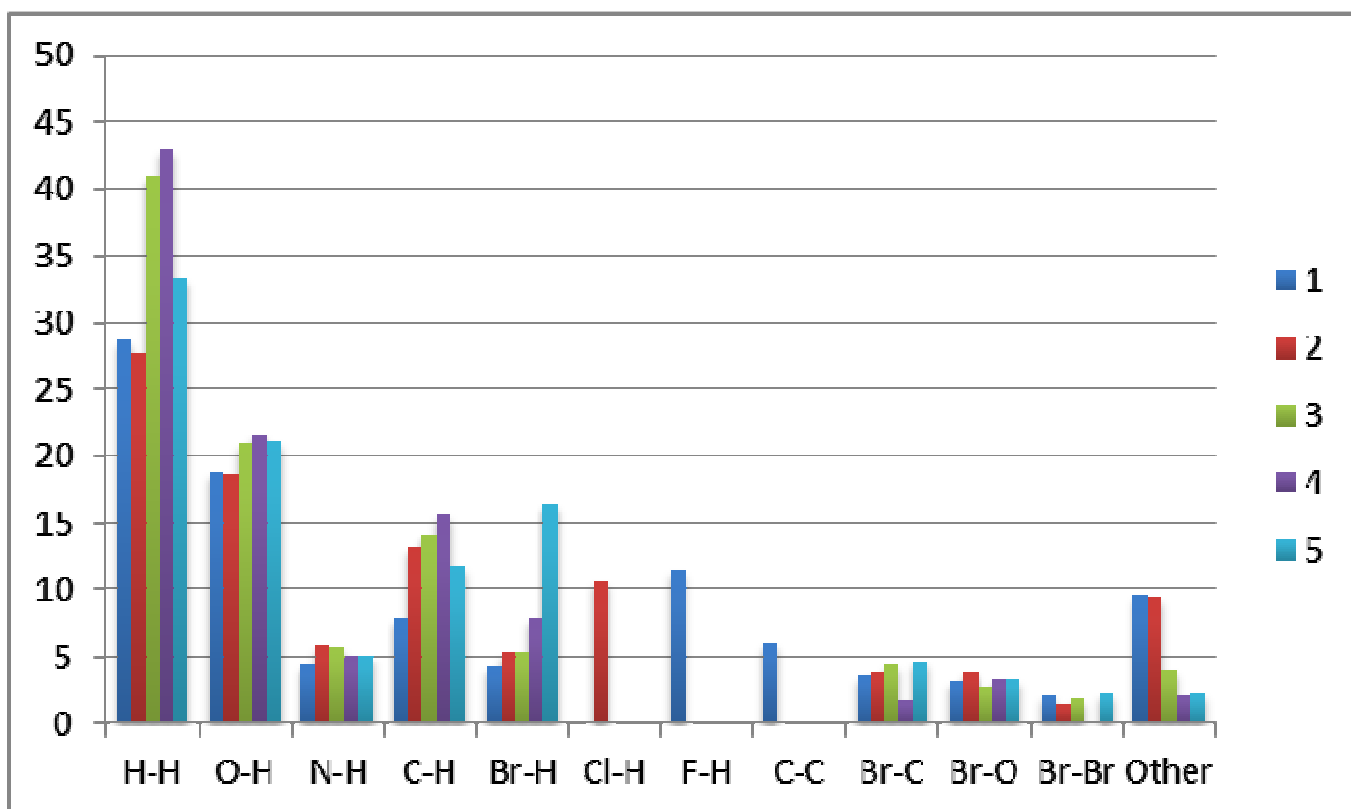

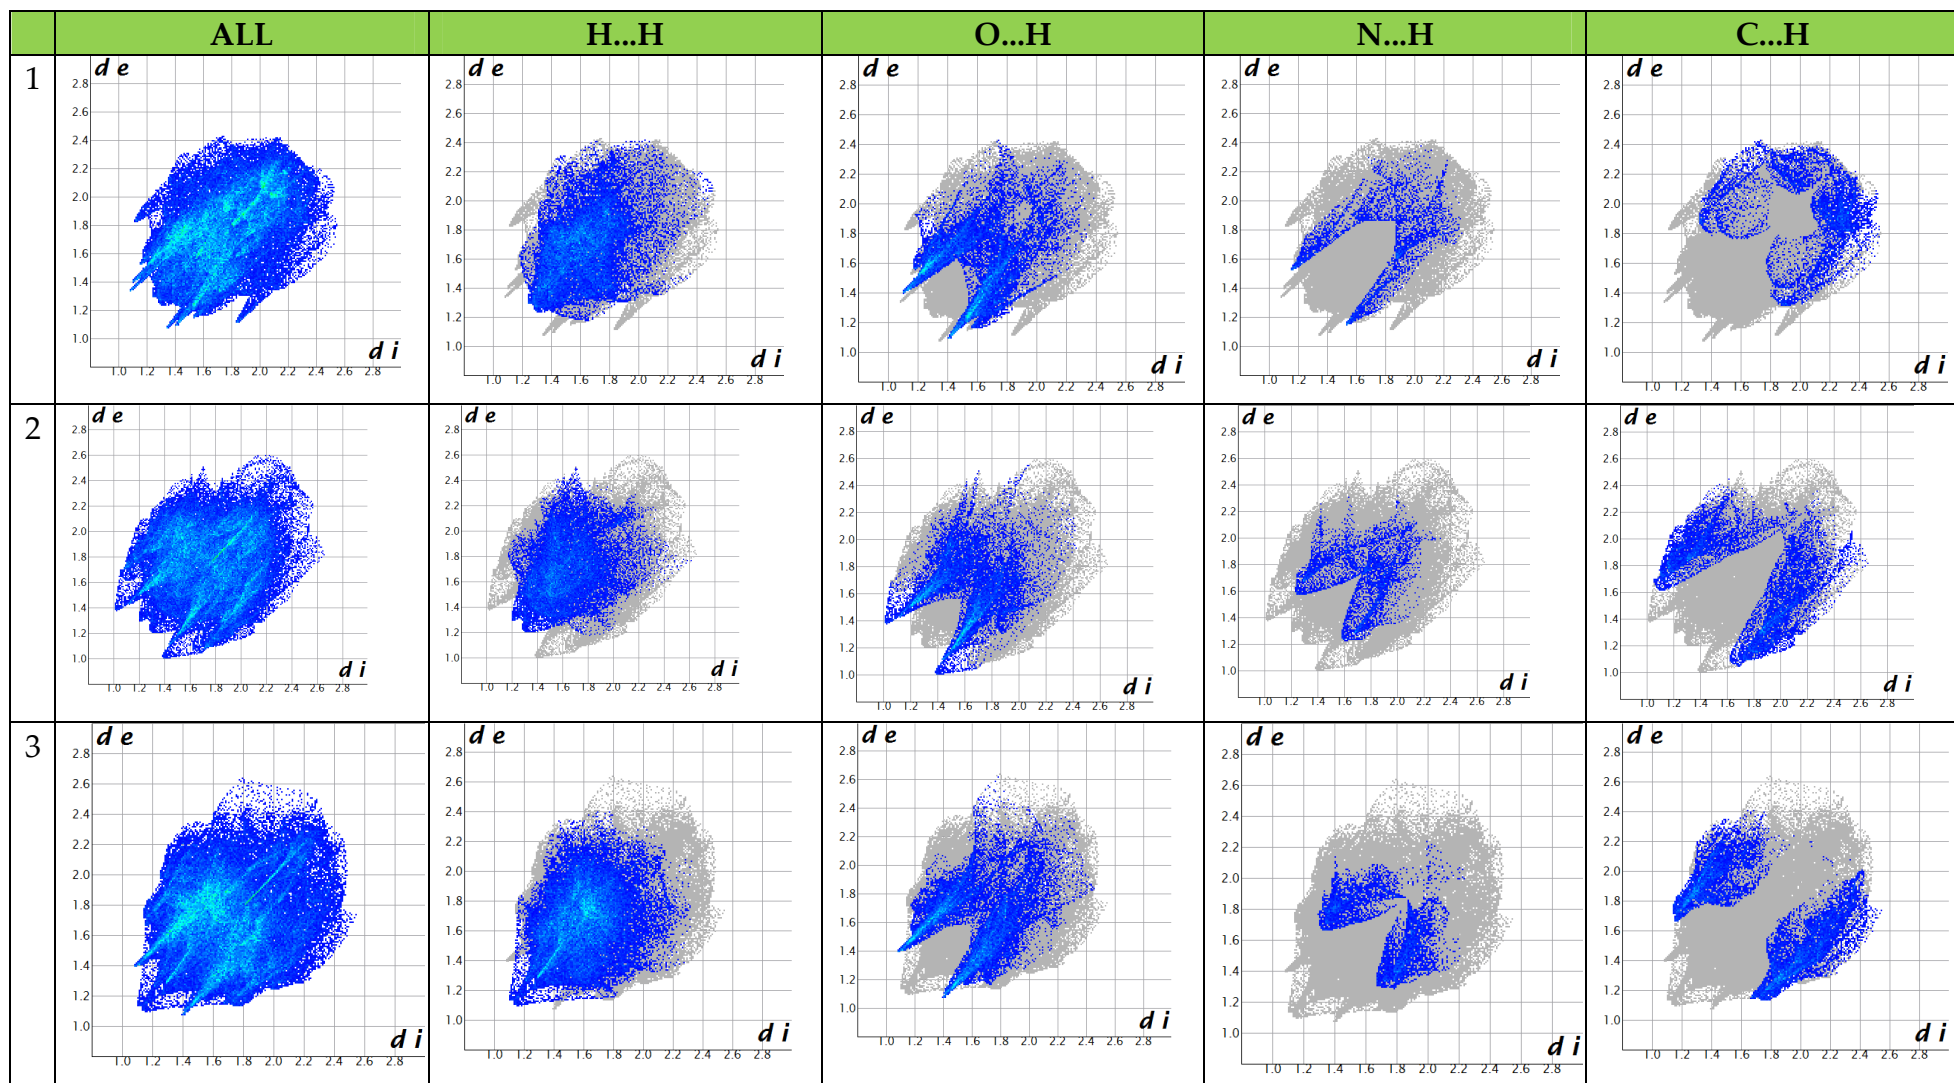

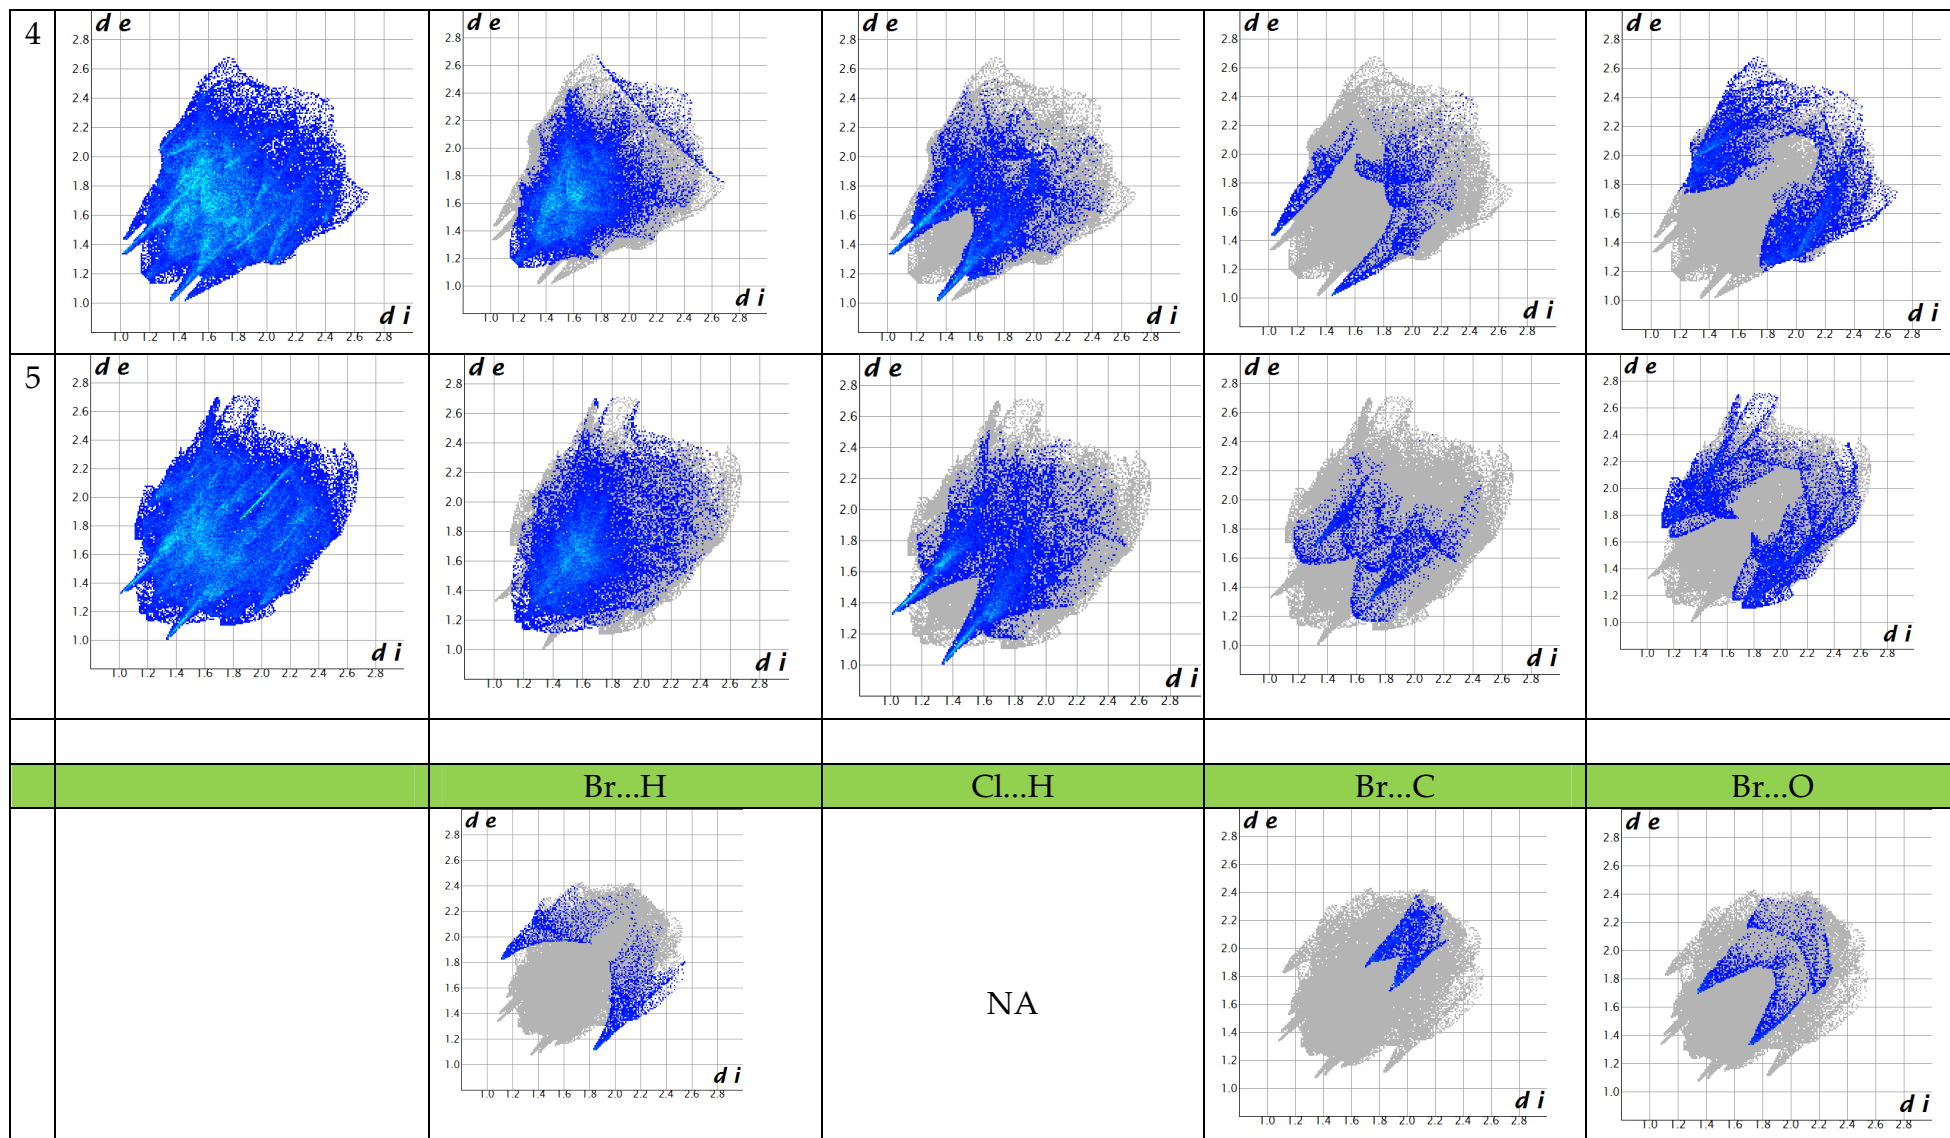



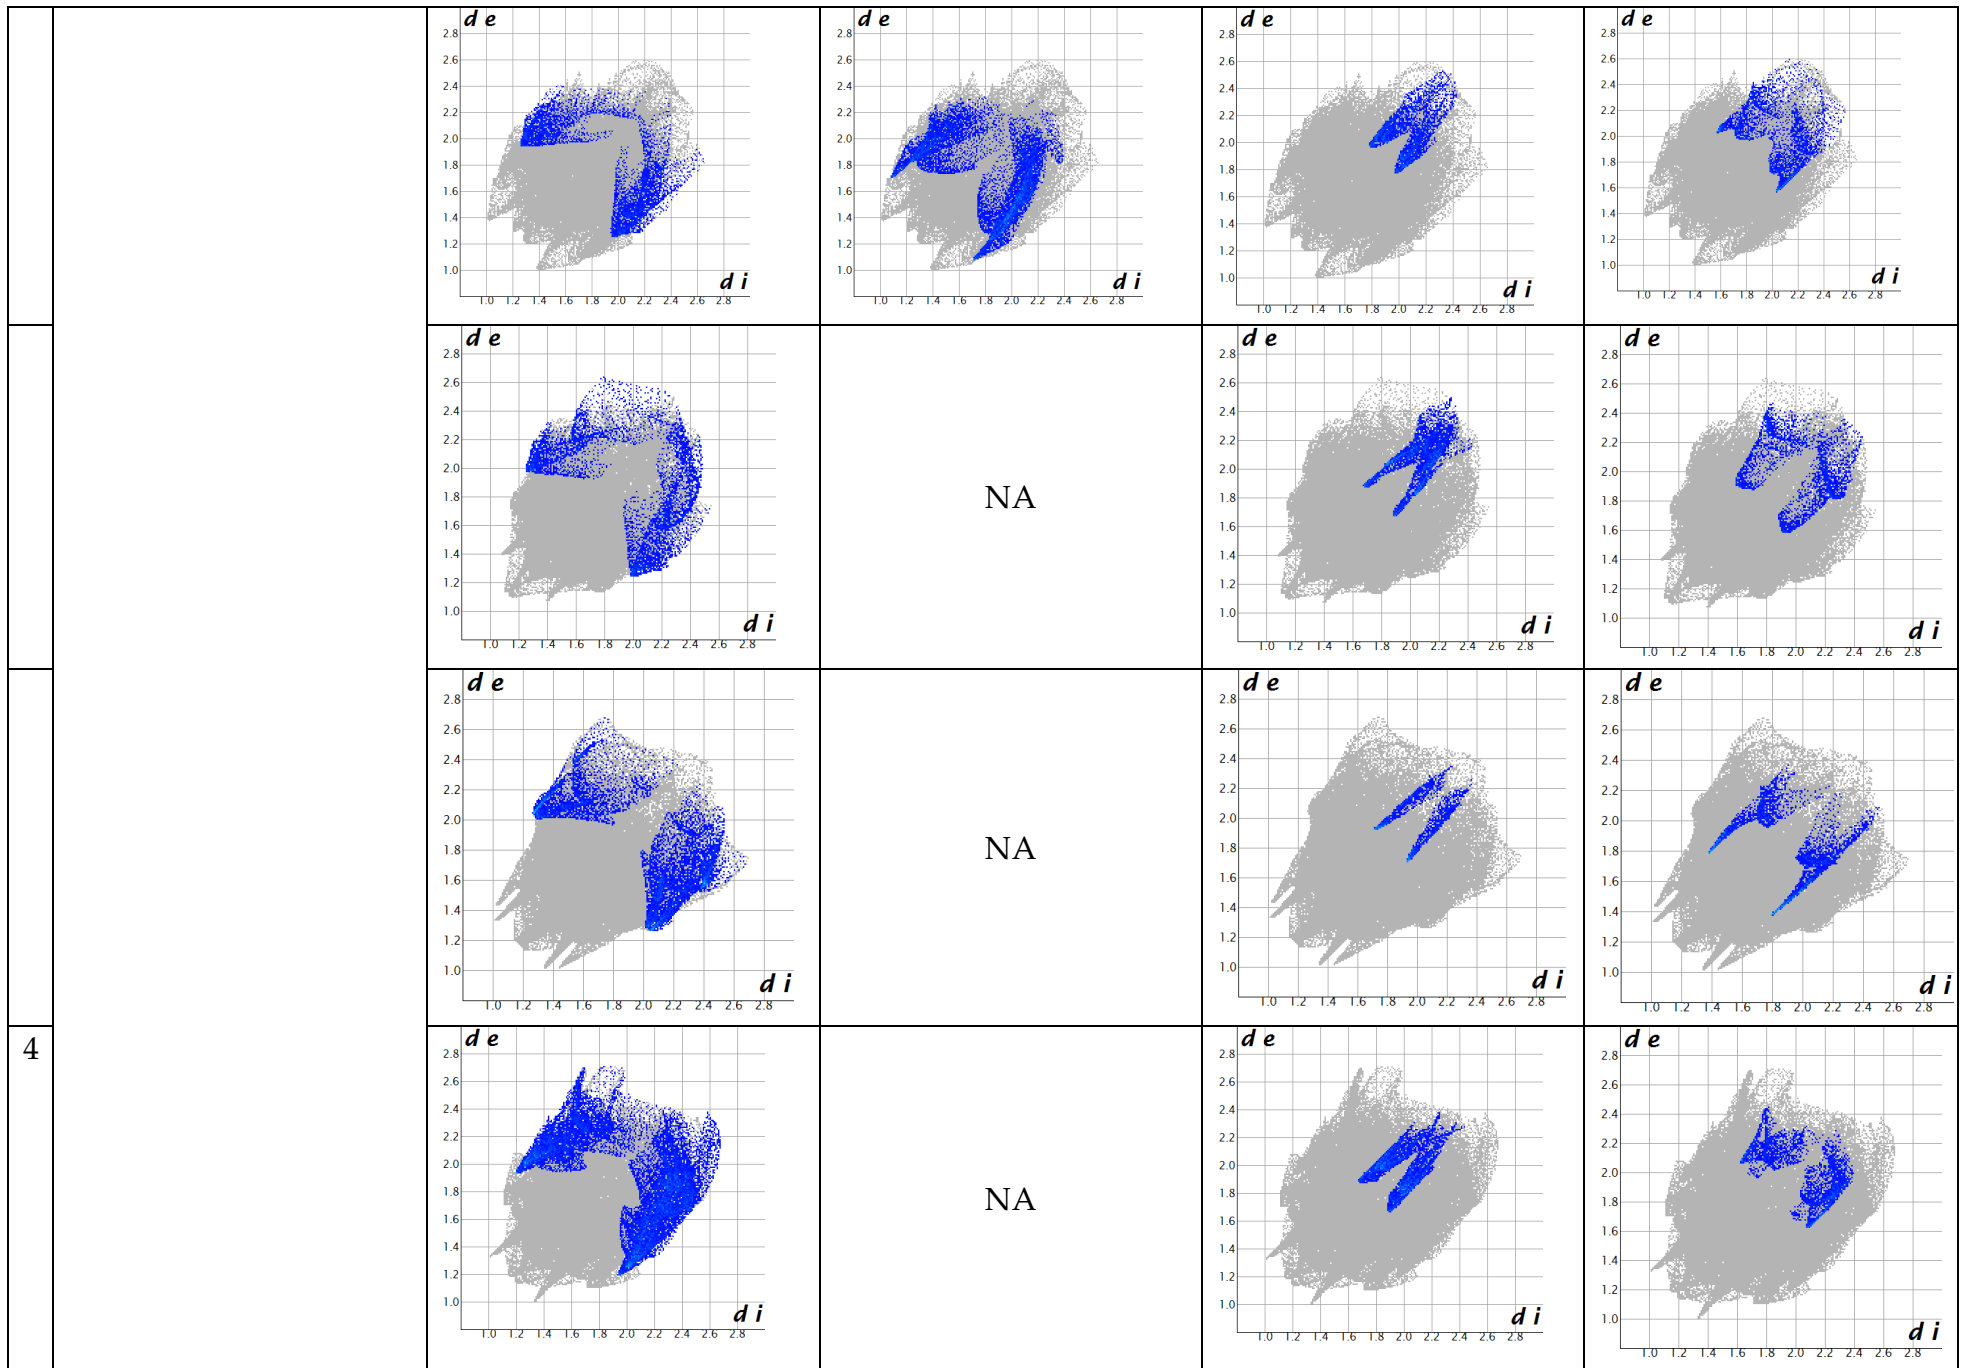

Br...Br

1

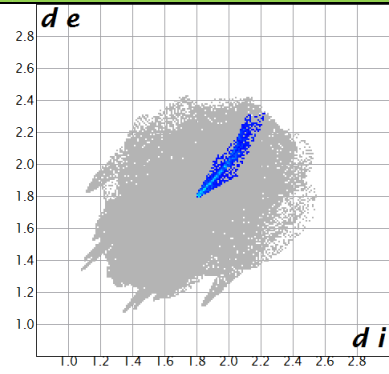

2

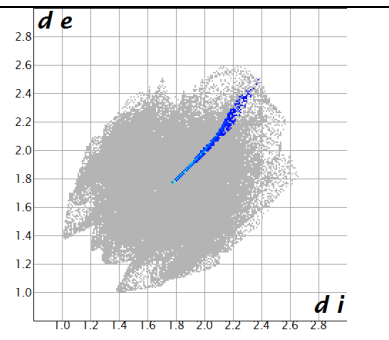

3

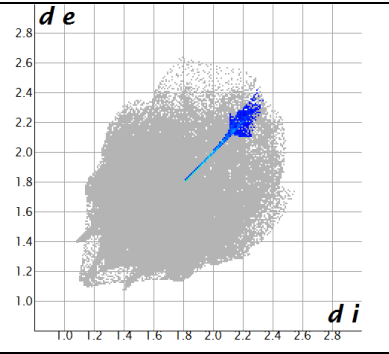

4

No contact

5

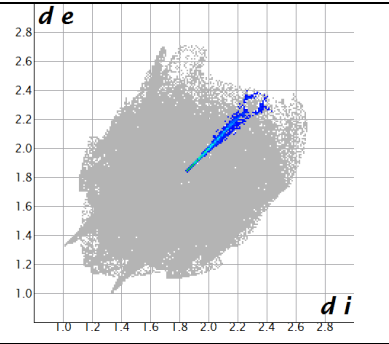

Supplement: d2ce01355j1.pdf [file d2ce01355j1.pdf]
